# Supplementary material
Source: PubMed Central journal article supplement (PMC5702536)
Supplement: NIHMS919242-supplement-SI.pdf [file NIHMS919242-supplement-SI.pdf]

**A**

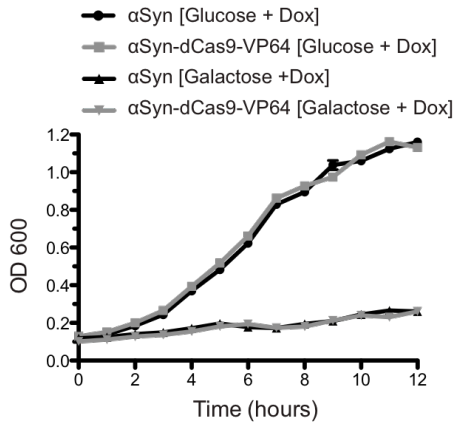

**B**

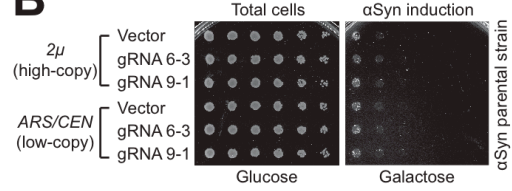

**C**

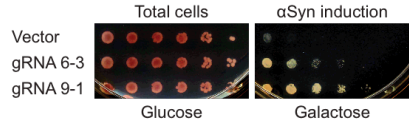

**D**

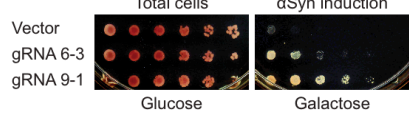

**E**

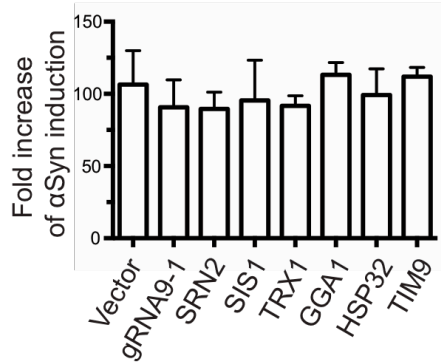

**F**

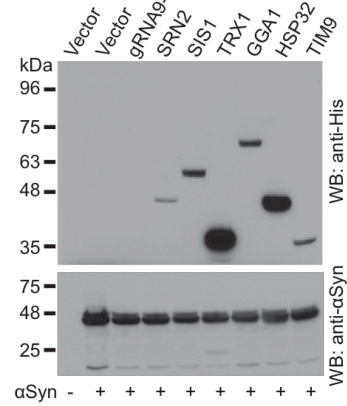

**G**

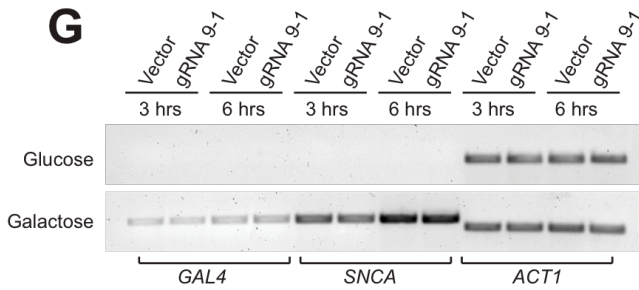

**H**

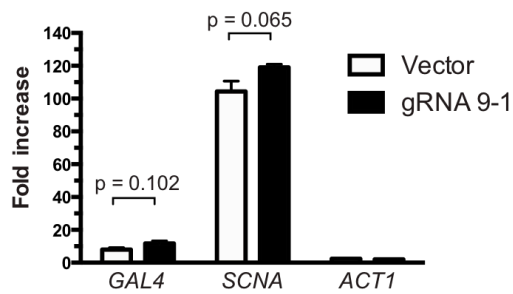

**I**

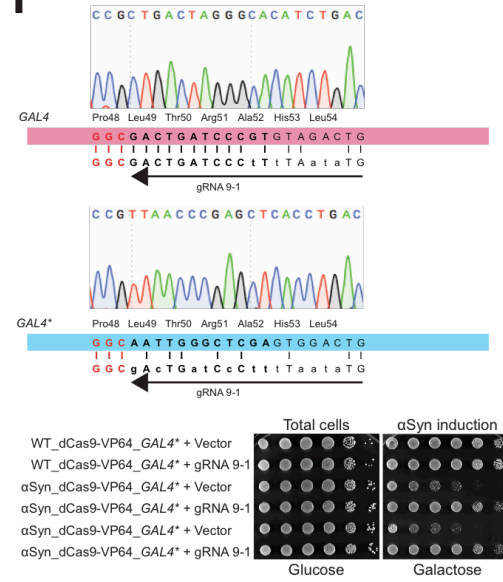

**Figure S1. gRNA-mediated suppression of  $\alpha$ Syn toxicity, related to Figure 1, Figure 2, and Table S1.**

**(A)** Growth profiles of the  $\alpha$ Syn-expressing parental yeast strain (black lines) as well as the  $\alpha$ Syn and crisprTF (dCas9-VP64)-expressing screen strain (gray lines) were determined in glucose and galactose media (which induces  $\alpha$ Syn expression), and in the presence of Dox for dCas9-VP64 induction. These cells did not contain any gRNAs. Cell density was measured by OD<sub>600</sub> at indicated time points. Parental and screen strains exhibited similar growth profiles in glucose media and both showed severe growth defects upon  $\alpha$ Syn induction by galactose, suggesting that expression of dCas9-VP64 by itself does not affect  $\alpha$ Syn-mediated toxicity. Error bars represent the standard error of three independent biological replicates.

**(B)** gRNA 6-3 and gRNA 9-1 were tested individually in the  $\alpha$ Syn-expressing parental yeast strain, which does not express dCas9-VP64 (crisprTF). Neither of the two gRNAs were able to suppress  $\alpha$ Syn toxicity in the absence of dCas9-VP64 (crisprTF). These results, along with the data presented in Figure 1B, demonstrate that the protective effect of gRNA 6-3 and gRNA 9-1 in  $\alpha$ Syn suppression depends on the expression of dCas9-VP64.

**(C-D)** With integrated crisprTF, both gRNAs also rescued yeast viability in the other two high  $\alpha$ Syn-expressing strains, HiTox (middle) and 4x $\alpha$ SynTox (bottom), which were published by Dr. Lindquist's group (Cooper et al., 2006; Gitler et al., 2009; Outeiro and Lindquist, 2003; Yeger-Lotem et al., 2009).

**(E)** Overnight cultures of the screen strain overexpressing the indicated genes were induced in Scm-Ura+Gal+Dox for 18 hours. The expression level of  $\alpha$ Syn-YFP was quantified by flow cytometry (using LSR Fortessa II flow cytometer equipped with 488/FITC laser/filter set) and normalized to the non-induced control (Scm-Ura+Glucose+Dox). Data are presented as mean  $\pm$  SEM of three biological replicates.

**(F)** The expression of  $\alpha$ Syn-YFP and individual genes was further validated by Western blotting of yeast whole cell lysates.

**(G)** Overnight cultures of screen yeast cells harboring no gRNA ('Vector') or gRNA 9-1 ('gRNA 9-1') were grown in glucose and galactose media for 3 and 6 hours. Total RNA was extracted from these samples, and the expression level of *GAL4*, *SNCA* ( $\alpha$ Syn) and *ACT1* were analyzed by RT-PCR using gene-specific primers. Representative data from two independent experiments are shown.

**(H)** Quantitative real-time PCR was performed with the same primers in (G) and normalized to the gene expression in glucose cultures (6 hours, n =4). Primers are listed in Table S5.

**(I)** One of the potential binding sites of gRNA 9-1 was located within the *GAL4* ORF (Table S1). To investigate the effect of gRNA 9-1/crisprTF on *GAL4* expression and exclude the possibility that gRNA 9-1's protective effect was mediated by repressing *GAL4* expression (which acts as the activator of *GALI* promoter, which drives the expression of  $\alpha$ Syn), the potential gRNA 9-1 binding site in the *GAL4* ORF in the screen strain was removed by replacing six synonymous codons from Leu49 to Leu54 (this modified *GAL4* is designated as *GAL4\**). Compared with the vector control, gRNA 9-1 consistently achieved  $\alpha$ Syn-toxicity suppression in two independent *GAL4\** screen strains, indicating that the rescued growth phenotype by gRNA 9-1/crisprTF was independent of the interaction between *GAL4* and gRNA 9-1.

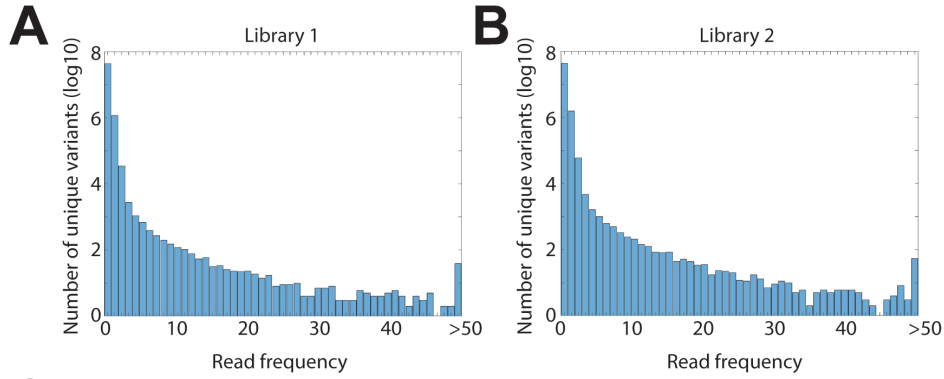

**C**

| Replicate | Number of total reads | Number of variants | Variants per total reads |
|-----------|-----------------------|--------------------|--------------------------|
| Library 1 | 46,053,460            | 44,767,330         | 0.982                    |
| Library 2 | 46,993,730            | 45,274,475         | 0.979                    |

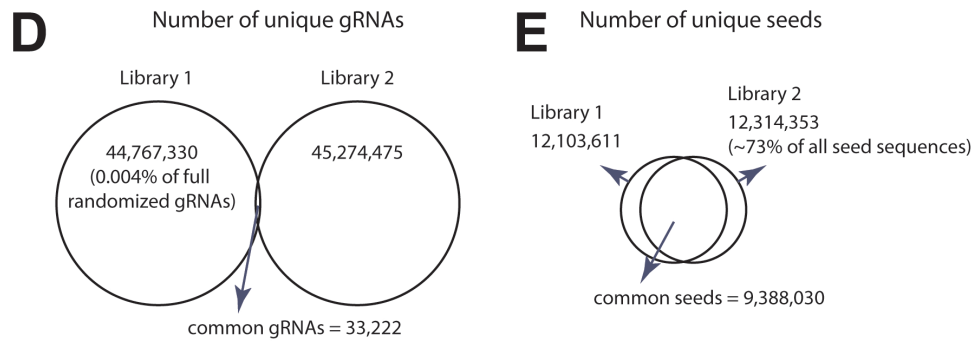

**F**

| Library 1 | N1    | N2    | N3    | N4    | N5    | N6    | N7    | N8    | N9    | N10   |
|-----------|-------|-------|-------|-------|-------|-------|-------|-------|-------|-------|
| G         | 20.11 | 20.30 | 21.11 | 21.51 | 20.45 | 19.17 | 18.74 | 18.37 | 18.27 | 18.73 |
| A         | 33.62 | 31.76 | 30.18 | 29.78 | 29.82 | 30.42 | 30.49 | 30.65 | 30.76 | 30.64 |
| T         | 38.17 | 32.83 | 33.71 | 33.80 | 34.58 | 34.91 | 35.28 | 35.48 | 35.48 | 35.00 |
| C         | 8.11  | 15.11 | 15.00 | 14.91 | 15.15 | 15.50 | 15.50 | 15.50 | 15.49 | 15.64 |

| Library 1 | N11   | N12   | N13   | N14   | N15   | N16   | N17   | N18   | N19   | N20   |
|-----------|-------|-------|-------|-------|-------|-------|-------|-------|-------|-------|
| G         | 19.53 | 19.93 | 20.08 | 20.25 | 19.63 | 18.70 | 18.43 | 18.34 | 17.70 | 23.09 |
| A         | 29.83 | 28.91 | 28.30 | 28.65 | 29.62 | 30.99 | 31.30 | 28.27 | 26.96 | 24.93 |
| T         | 34.54 | 34.38 | 34.20 | 33.63 | 33.64 | 34.03 | 34.83 | 36.57 | 37.49 | 36.86 |
| C         | 16.10 | 16.77 | 17.43 | 17.47 | 17.11 | 16.27 | 15.44 | 16.82 | 17.84 | 15.12 |

**G**

| Library 2 | N1    | N2    | N3    | N4    | N5    | N6    | N7    | N8    | N9    | N10   |
|-----------|-------|-------|-------|-------|-------|-------|-------|-------|-------|-------|
| G         | 20.34 | 21.02 | 21.99 | 22.48 | 21.02 | 19.35 | 18.52 | 17.94 | 17.82 | 18.55 |
| A         | 33.65 | 31.17 | 29.64 | 29.50 | 29.80 | 30.74 | 31.13 | 31.35 | 31.19 | 30.76 |
| T         | 38.12 | 32.00 | 32.58 | 32.58 | 33.63 | 34.22 | 35.10 | 35.62 | 35.81 | 35.10 |
| C         | 7.88  | 15.81 | 15.78 | 15.44 | 15.54 | 15.68 | 15.25 | 15.09 | 15.17 | 15.59 |

| Library 2 | N11   | N12   | N13   | N14   | N15   | N16   | N17   | N18   | N19   | N20   |
|-----------|-------|-------|-------|-------|-------|-------|-------|-------|-------|-------|
| G         | 19.81 | 20.72 | 21.18 | 21.42 | 20.55 | 19.29 | 18.54 | 17.90 | 17.09 | 22.23 |
| A         | 29.55 | 28.35 | 27.52 | 27.87 | 29.10 | 30.96 | 31.43 | 28.78 | 27.61 | 25.55 |
| T         | 34.19 | 33.40 | 32.85 | 32.20 | 32.46 | 33.09 | 34.47 | 36.70 | 37.81 | 37.18 |
| C         | 16.45 | 17.54 | 18.45 | 18.51 | 17.90 | 16.66 | 15.55 | 16.62 | 17.49 | 15.04 |

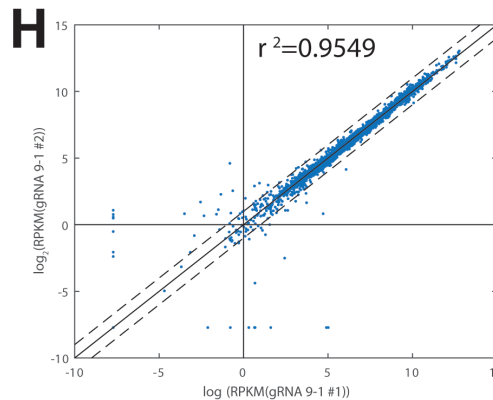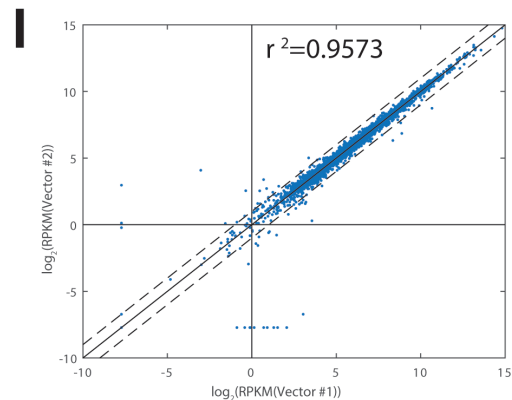



**Figure S2. Randomized gRNA libraries for crisprTF-based screening, related to Figure 1 and Table S2.**

**(A-B)** The numbers of unique gRNAs were quantitated by pooled Illumina sequencing after introduction of the library into the yeast screen strain. The two biological replicates (Library 1 and 2) were transformed and built from the same DNA library described in Detailed Protocols.

**(C)** About 98% of reads obtained from Illumina sequencing were unique variants when sequenced at a depth of ~45 million reads.

**(D)** Due to the large oligo library ( $4^{12} = \sim 1$  trillion) used to build the libraries prior to yeast transformation, only about 0.004% of the theoretical diversity of the 20-nucleotide randomized gRNAs was covered in each transformation reaction. Therefore, gRNAs that overlapped between two libraries (that were transformed from the same oligo stock) were rare (<0.1%).

**(E)** The experimental coverage for the seed sequences was ~73% of the theoretical diversity (~12 million unique seed sequences were detected in either library out of a theoretical diversity of  $4^{12}$ ). About 56% of all possible seed sequences were present in both of our transformed libraries (~9.4 million out of  $4^{12}$ ).

**(F-G)** The DNA library used to encode randomized gRNAs was synthesized to be AT-rich (A = 32%, T = 32%, C = 18%, and G = 18% at each position) to match the average GC-content of yeast promoters. The frequency of the randomized 20-mer nucleotides was analyzed by two deep sequencing replicates. The normalized values match the designed GC-content of the randomized synthetic oligos, indicating that the library was accurately re-constructed from the randomized oligos *in vivo*.

**(H)** Scatter plot of the RNA-Seq data demonstrates that most of the gRNA 9-1 modulated genes had a concordant change in the levels of expression between two biological replicates,  $r^2 = 0.9549$ .

**(I)** Linear regression between two sequencing replicates carrying the vector control,  $r^2 = 0.9573$ . Mean of RPKM values of the biological replicates for gRNA 9-1 and vector control were compared and plotted as a Volcano plot (Figure 1C); there were numerous outliers (FDR-adjusted p-value  $\leq 0.1$ , fold-change  $\geq 2$ , indicating that a specific group of genes (detailed in Table S2) was differentially modulated by gRNA 9-1.

**A**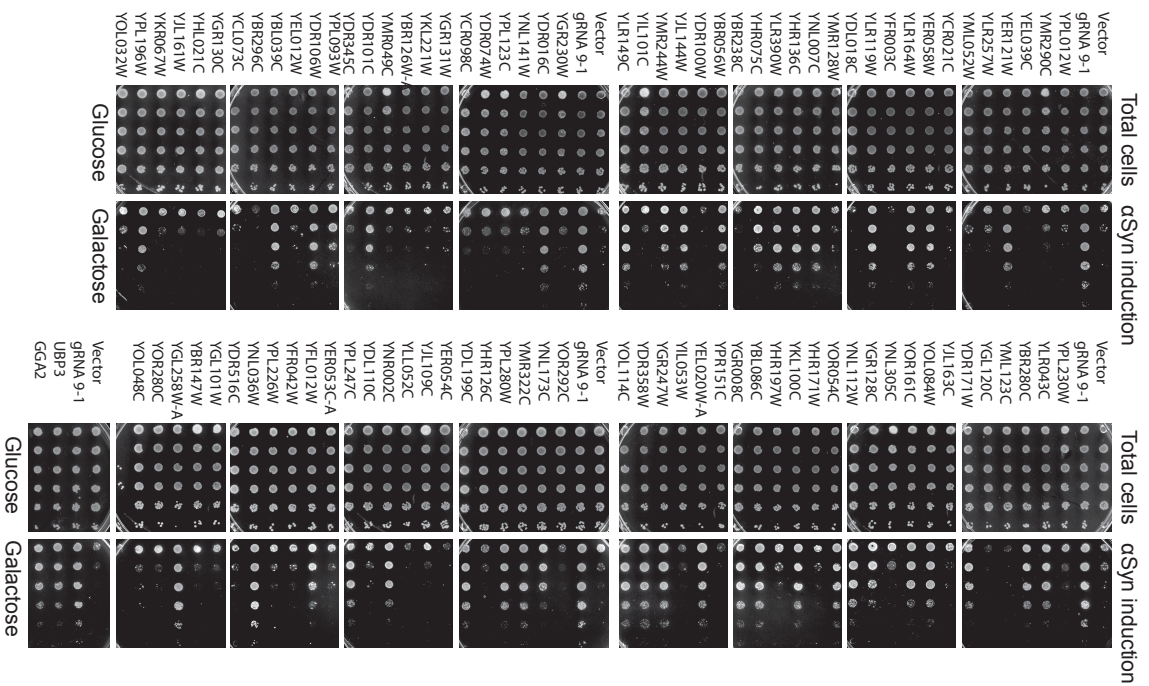**B**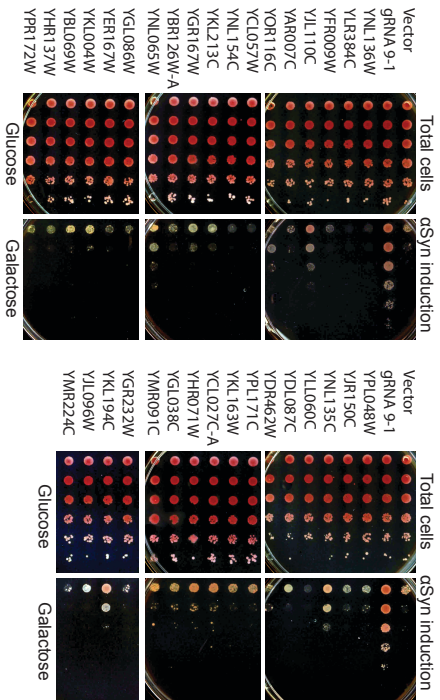

**Figure S3. Systematic overexpression of genes modulated by gRNA 9-1 and evaluation of their effects on  $\alpha$ Syn toxicity in yeast, related to Figure 2, Table S2, and Table S4.**

**(A)** Plasmids containing genes that are modulated by gRNA 9-1 were obtained from the yeast ORF library (Open Biosystems Yeast ORF Collection) and transformed into the screen strain. Cells expressing individual genes were spotted onto galactose plates and scored for the suppression of  $\alpha$ Syn toxicity in comparison to cells expressing dCas9-VP64 and gRNA 9-1 as well as those expressing dCas9-VP64 and vector control. *UBP3* (a known suppressor of  $\alpha$ Syn toxicity) was used as a positive control. A complete list of differentially expressed genes and annotations as well as associated scores are presented in Table S2.

**(B)** Examination of  $\alpha$ Syn-toxicity suppression by a randomly selected set of overexpressed genes from the yeast ORF library. Thirty-four yeast genes were randomly chosen from the yeast ORF library (Open Biosystems Yeast ORF Collection) and transformed into the screen strain. Cell survival in the presence of  $\alpha$ Syn induction was measured by spotting assays and compared to survival of cells expressing dCas9-VP64 and gRNA 9-1 ('gRNA 9-1'; scored as 6) as well as those expressing dCas9-VP64 and vector control ('Vector'; scored as 1). Only five genes (*YJL110C*, *YOR116C*, *YNL065W*, *YNL135C*, and *YKL194C*) out of 34 genes scored greater than or equal to 3. A complete list of genes and annotations as well as associated scores are presented in Table S4.

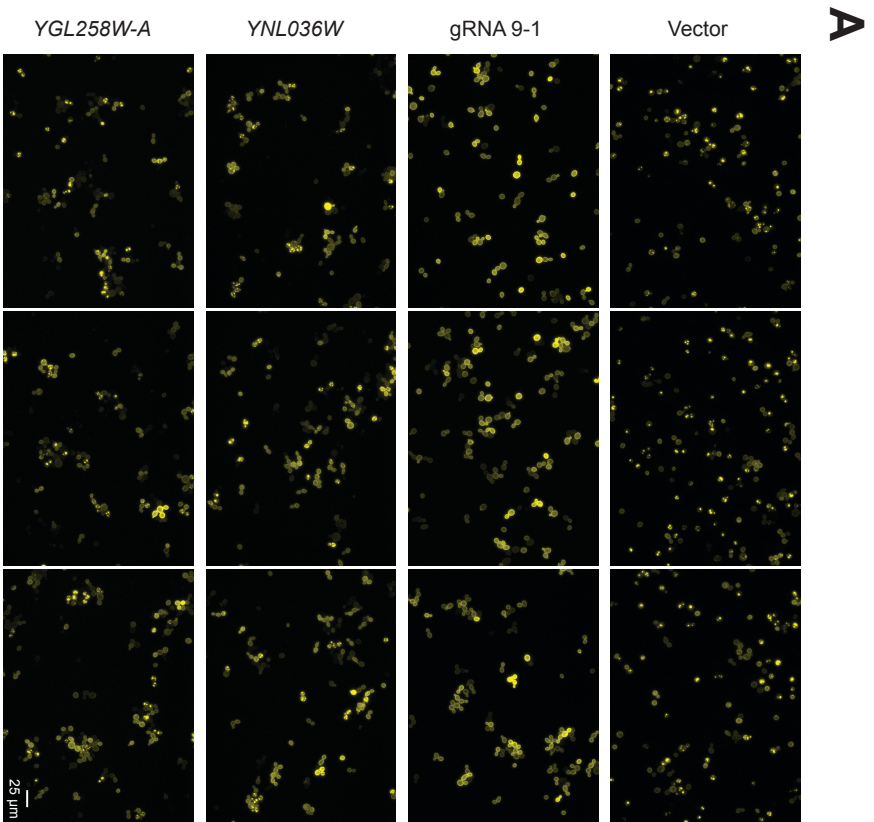

| Overexpression | RNA-Seq (Log2) | Cells with aSyn aggregates | Score of aSyn Suppression | Biological Function |
|----------------|----------------|----------------------------|---------------------------|---------------------|
| Vector Control | 91.7%          | 1                          | 10                        | Carbonic anhydrase  |
| gRNA 9-1       | 6.5%           | 6                          | 6                         | Unknown             |
| YNL036W        | 42.8%          | 5                          | 5                         | Unknown             |
| YGL258W-A      | 58.4%          | 5                          | 5                         | Unknown             |

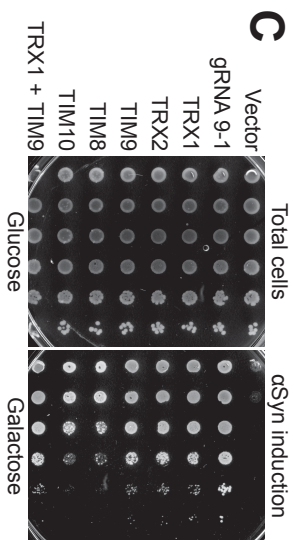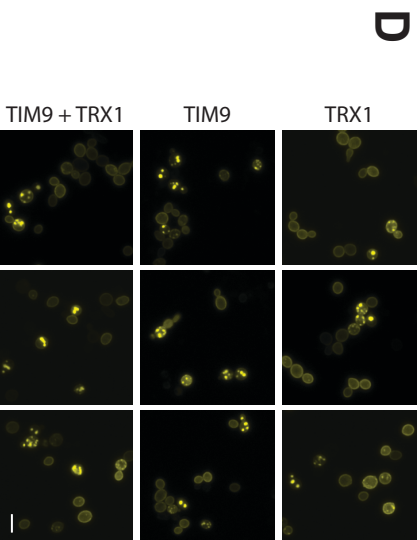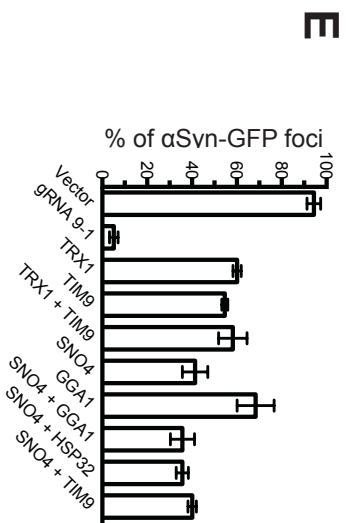

**Figure S4. gRNA 9-1/crisprTF is the strongest modulator of  $\alpha$ Syn-induced phenotypes, related to Figure 2, Table 1, and Table S2.**

**(A-B)** We systematically tested the protective effects of the individual genes that were differentially controlled by gRNA 9-1/crisprTF. Fluorescent microscopy clearly showed that gRNA 9-1/crisprTF was the strongest suppressor of  $\alpha$ Syn aggregates compared with any individual genes found in this study or previous genome-wide screens.  $\alpha$ Syn-YFP foci were observed in only 6.5% of cells that overexpressed gRNA 9-1/crisprTF (scored as 10). This significantly outperformed cells overexpressing *YNL036W* (42.8% cells with  $\alpha$ Syn-YFP foci; scored as 6), *YGL258W-A* (58.4% cells with  $\alpha$ Syn-YFP foci; scored as 5), and other individual genes in Figure 2 (summarized in Table 1 and Table S2).

**(C)** Yeast *TRX* and *TIM* family proteins function together to protect mitochondria from oxidative stresses (Durigon et al., 2012). Genes in both families were highlighted in gRNA 9-1 expression profiling. Cells harboring individual genes from *TRX* (*TRX1* and *TRX2*) and *TIM* (*TIM8*, *TIM9*, and *TIM10*) families were overexpressed in the yeast screen strain to test for  $\alpha$ Syn-toxicity protection. All these proteins strongly suppressed  $\alpha$ Syn toxicity when overexpressed. We did not observe synergistic protective effects in yeast assays when *TRX1* and *TIM9* were co-expressed, in contrast to our results in human cells.

**(D)** Representative images of  $\alpha$ Syn-YFP foci in screen yeast cells overexpressing *TRX1*, *TIM9* or both. Bar = 10  $\mu$ m.

**(E)** Other co-expressed gene pairs (*SNO4* + *GGAI*, *SNO4* + *HSP32*, and *SNO4* + *TIM9*) were tested in  $\alpha$ Syn-YFP foci assays. None of them demonstrated synergistic  $\alpha$ Syn protection compared to single gene expression.

**A**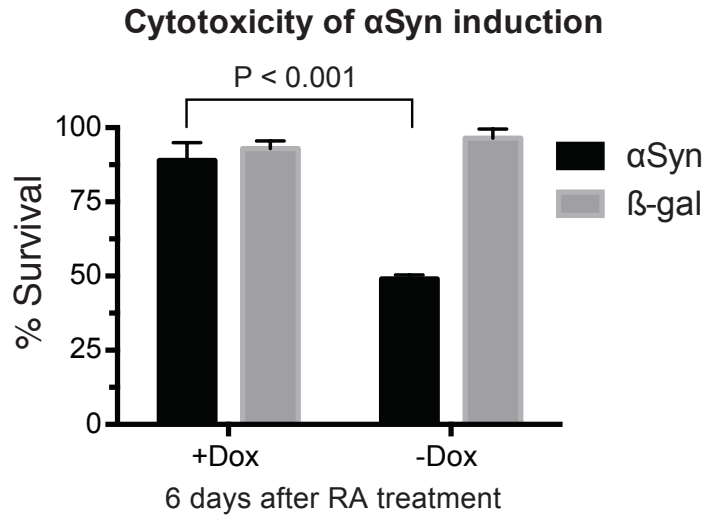**B**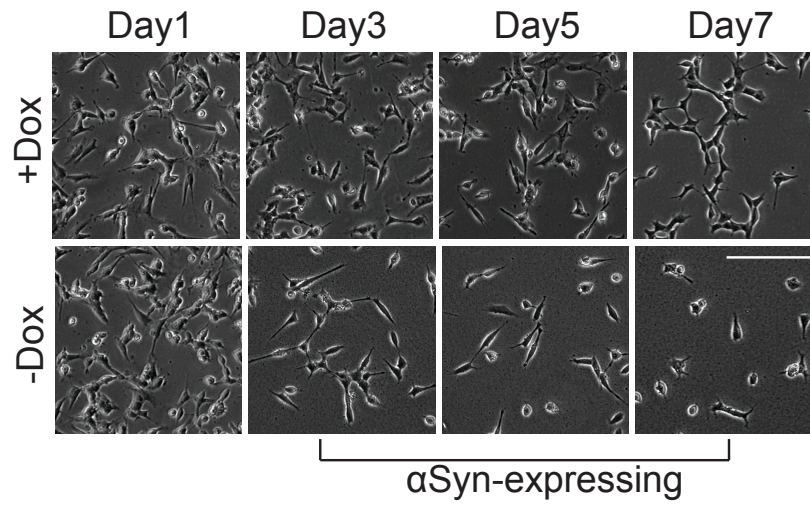**C**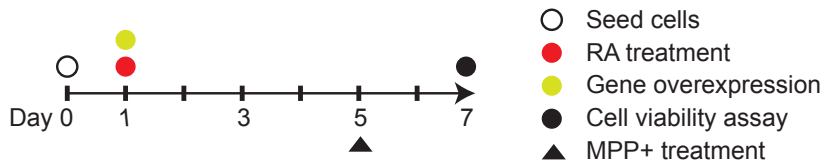**D**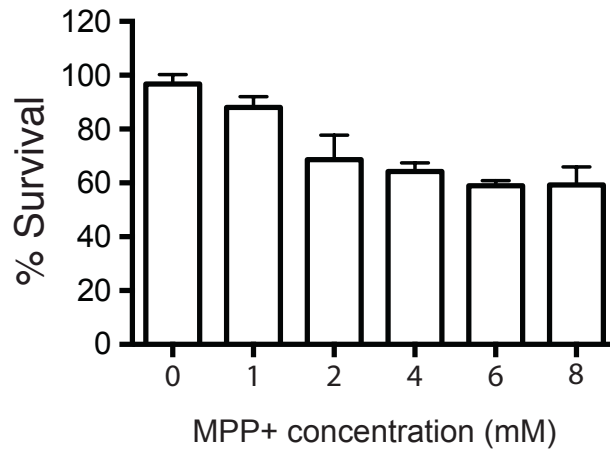

**Figure S5. Inducible expression of  $\alpha$ Syn in the human neuronal model of PD, related to Figure 3.**

**(A)**  $\alpha$ Syn and  $\beta$ -gal (non-toxic negative control) expression were induced in human SH-SY5Y neuroblastoma cells by removal of Dox from media.  $\alpha$ Syn-expressing cells significantly lost viability at the 6th day post-differentiation (retinoic acid treatment).

**(B)** Representative images showing retraction of neuritic processes, membrane blebbing, and cell death in  $\alpha$ Syn-expressing cells (-Dox condition). Bar = 10  $\mu$ m.

**(C)** Schematic of the experimental procedure used to study the effect of MPP<sup>+</sup>, a known inducer of neuronal cell death, on differentiated SH-SY5Y cells.

**(D)** A series of titration treatments were performed to identify minimal concentration of MPP<sup>+</sup> that result in maximal toxicity. Cells were treated with different concentrations of MPP<sup>+</sup> for 48 hours and cell viability was measured by CellTiter-Glo luminescent assay and normalized to the non-MPP<sup>+</sup> treatment (n = 3). 6 mM MPP<sup>+</sup> was found to be the optimal concentration for maximal toxicity and therefore was used in the survival assay.



## Protocols: Randomized gRNA Library Construction and Screening

1. Prepare yeast competent cells
  - a. Grow 100 mL overnight culture of the yeast screen strain in YPD media.
  - b. Collect cells by spinning down for 3 minutes at 5000 RPM. Wash twice with 40 mL distilled water with centrifugation for 3 minutes at 5000 RPM and collect cells again.
  - c. Resuspend cells in 800  $\mu$ L distilled water and transfer to a fresh 2 mL microcentrifuge tube. Spin down for 1 minute at 5000 RPM. Remove water and resuspend cells in 1 mL filtered 0.1 M Lithium Acetate (Sigma) by pipetting.
  - d. Incubate cells for 30 minutes at 30°C.
  - e. Prepare the transformation master mix. For each reaction:

| Reagents                                                | Volume ( $\mu$ L) |
|---------------------------------------------------------|-------------------|
| 1 M Lithium Acetate (Sigma)                             | 40                |
| 10 mg/mL Denatured Salmon Sperm DNA (Life Technologies) | 5                 |
| 50% Polyethylene Glycol 3350 (Sigma)                    | 240               |
| Distilled Water                                         | 65                |
| <b>Total</b>                                            | <b>350</b>        |

2. Construct and screen randomized gRNA library
  - a. Linearize the gRNA backbone vector (pRS426-gRNA-HindIII-EcoRI) by HindIII-HF and EcoRI-HF double digestion for 2 hour at 37 °C.

| Reagents                                  | Volume ( $\mu$ L) |
|-------------------------------------------|-------------------|
| Vector DNA (1 $\mu$ g/ $\mu$ L)           | 2                 |
| HindIII-HF (New England Biolabs)          | 1                 |
| EcoRI-HF (New England Biolabs)            | 1                 |
| 10X CutSmart Buffer (New England Biolabs) | 5                 |
| Distilled Water                           | 41                |
| <b>Total</b>                              | <b>50</b>         |

- b. The linearized DNA (5761bp) was purified and cleaned by QIAquick Gel Extraction Kit (Qiagen). Elute DNA in 40  $\mu$ L distilled water in the final step, followed by DNA concentration.
  - c. The randomized oligo library was synthesized by IDT using the following template: 5'-GCTGGGAACGAAACTCTGGGAGCTGCGATTGGCAG(N1:32181832)(N1)(



AATTAACCCTCACTAAAGG-3') and T7-promoter (5'-TAATACGACTCACTATAGG-3') primers.

- c. PCR-amplified gRNA fragments (1034bp) were purified by QIAquick Gel Extraction Kit (Qiagen), and then were cloned back in the linearized pRS426-gRNA-HindIII-EcoRI vector by using Gibson assembly. Independent clones were randomly chosen for Sanger sequencing.
- d. Verified gRNA constructs were individually transformed in both the parental and screen yeast strains to test the suppression of  $\alpha$ Syn toxicity.
